# Supplementary material for: Luminescent Alendronic Acid-Conjugated Micellar Nanostructures for Potential Application in the Bone-Targeted Delivery of Cholecalciferol
Source: MDPI journal article supplement (doi:10.3390/molecules29102367), 2024-05-17
Supplement: s1 [file s1]

Supplementary Material

# Luminescent Alendronic Acid-Conjugated Micellar Nanostructures for Potential Application in the Bone-Targeted Delivery of Cholecalciferol

Federica Rizzi <sup>1,2</sup>, Annamaria Panniello <sup>1</sup>, Roberto Comparelli <sup>1,2</sup>, Iliaria Arduino <sup>3</sup>, Elisabetta Fanizza <sup>1,2,4</sup>, Rosa Maria Iacobazzi <sup>3</sup>, Maria Grazia Perrone <sup>5</sup>, Marinella Striccoli <sup>1</sup>, Maria Lucia Curri <sup>1,2,4</sup>, Antonio Scilimati <sup>5</sup>, Nunzio Denora <sup>3,\*</sup> and Nicoletta Depalo <sup>1,2,\*</sup>

<sup>1</sup> CNR-Institute for Chemical and Physical Process, 70125 Bari, Italy; f.rizzi@ba.ipcf.cnr.it (F.R.); a.panniello@ba.ipcf.cnr.it (A.P.); r.comparelli@ba.ipcf.cnr.it (R.C.); elisabetta.fanizza@uniba.it (E.F.); m.striccoli@ba.ipcf.cnr.it (M.S.); marialucia.curri@uniba.it (M.L.C.)

<sup>2</sup> Consorzio Interuniversitario Nazionale per la Scienza e Tecnologia dei Materiali (INSTM), 50121 Firenze, Italy

<sup>3</sup> Department of Pharmacy—Pharmaceutical Sciences, University of Bari, 70125 Bari, Italy; ilaria.arduino@uniba.it (I.A.); rosa.iacobazzi@uniba.it (R.M.I.)

<sup>4</sup> Department of Chemistry, University of Bari, 70125 Bari, Italy

<sup>5</sup> Research Laboratory for Woman and Child Health, Department of Pharmacy—Pharmaceutical Sciences, University of Bari, 70125, Bari, Italy; mariagrazia.perrone@uniba.it (M.G.P.); antonio.scilimati@uniba.it (A.S.)

\* Correspondence: nunzio.denora@uniba.it (N.D.); n.depalo@ba.ipcf.cnr.it (N.D.)

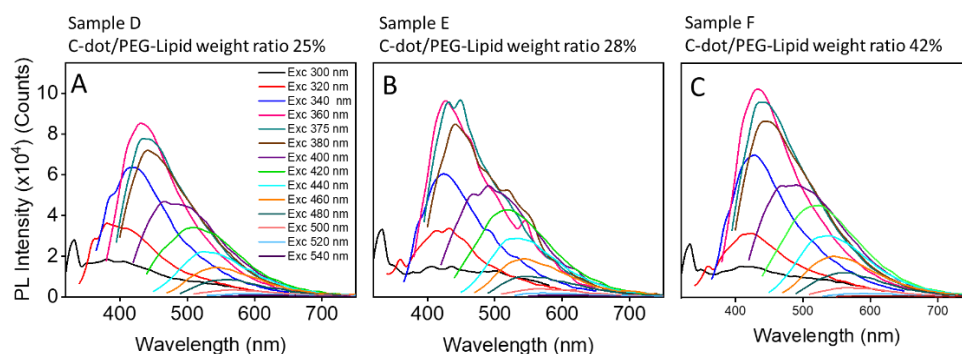

**Figure S1.** PL emission spectra recorded at the excitation wavelength from 300 to 540 nm of micellar nanostructures prepared at different starting C-dot/PEG-phospholipid weight ratio percentage: A) 25%, B) 28% and C) 42% that correspond to the samples D, E and F of the table in the Figure 2A of the manuscript. PL emission spectra of the samples recorded in PBS buffer (1:3 dilution).

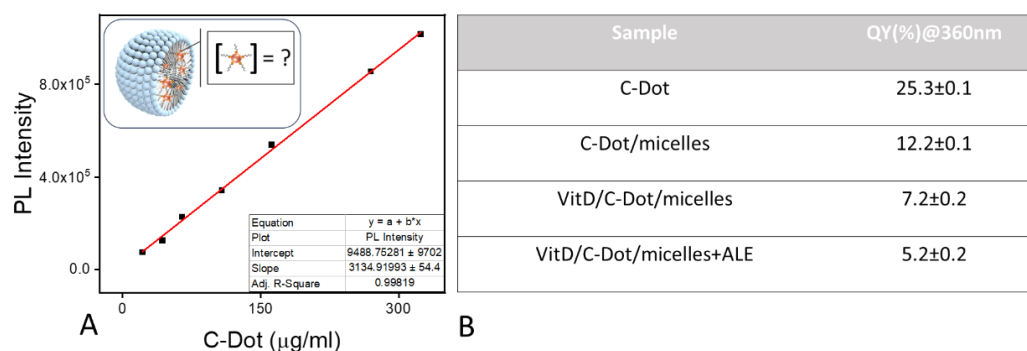

**Figure S2.** A) Calibration curve of C-dots by PL spectroscopy ( $\lambda_{\text{ex}}$  360 nm) obtained starting from the concentration of C-dots from 21 to 324 µg/mL, added to a solution containing the phospholipids at the fixed concentration of 7.5 mg/mL; B) Absolute QY (%) of C-dots in CHCl<sub>3</sub> dispersion and C-dots/micelles, VitD/C-dots/micelles and VitD/C-dots/micelles-ALE nanoformulations redispersed in CHCl<sub>3</sub> as a function of the excitation wavelength (360 nm).

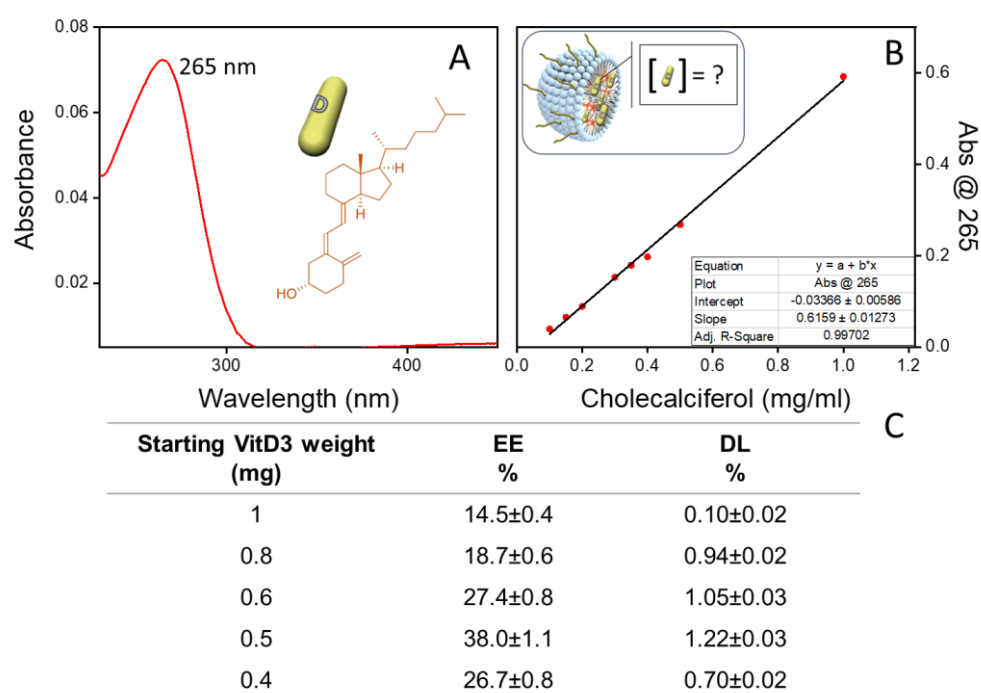

**Figure S3.** A) UV-Vis absorption spectrum of the VitD3 in methanol; B) Calibration curve of VitD3 plotted by preparing standard methanol solutions containing VitD3 in the concentration range of 0.1 and 1 mg/mL, obtained by recording the maximum absorbance value of each solution at 265 nm; C. EE% and DL% values of different nanoformulations obtained starting from different initial amounts of VitD3.

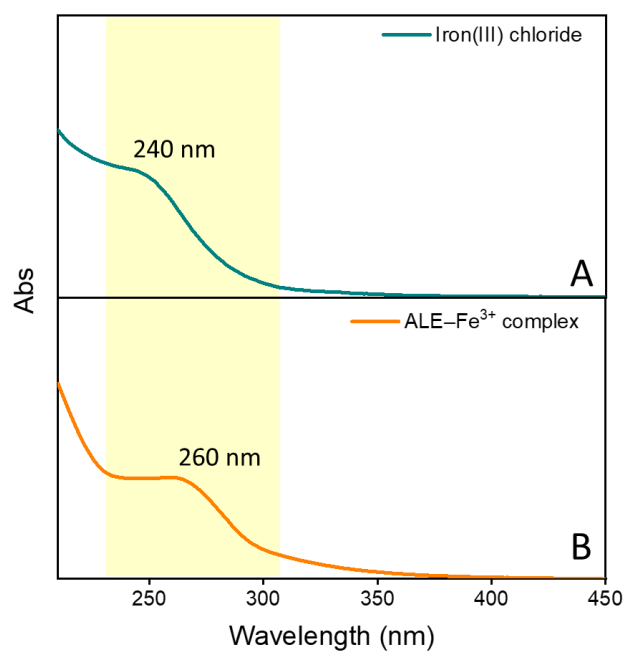

**Figure S4.** UV-Vis absorption spectrum of A) Fe<sup>3+</sup> and B) synthesized ALE-Fe<sup>3+</sup> complex.

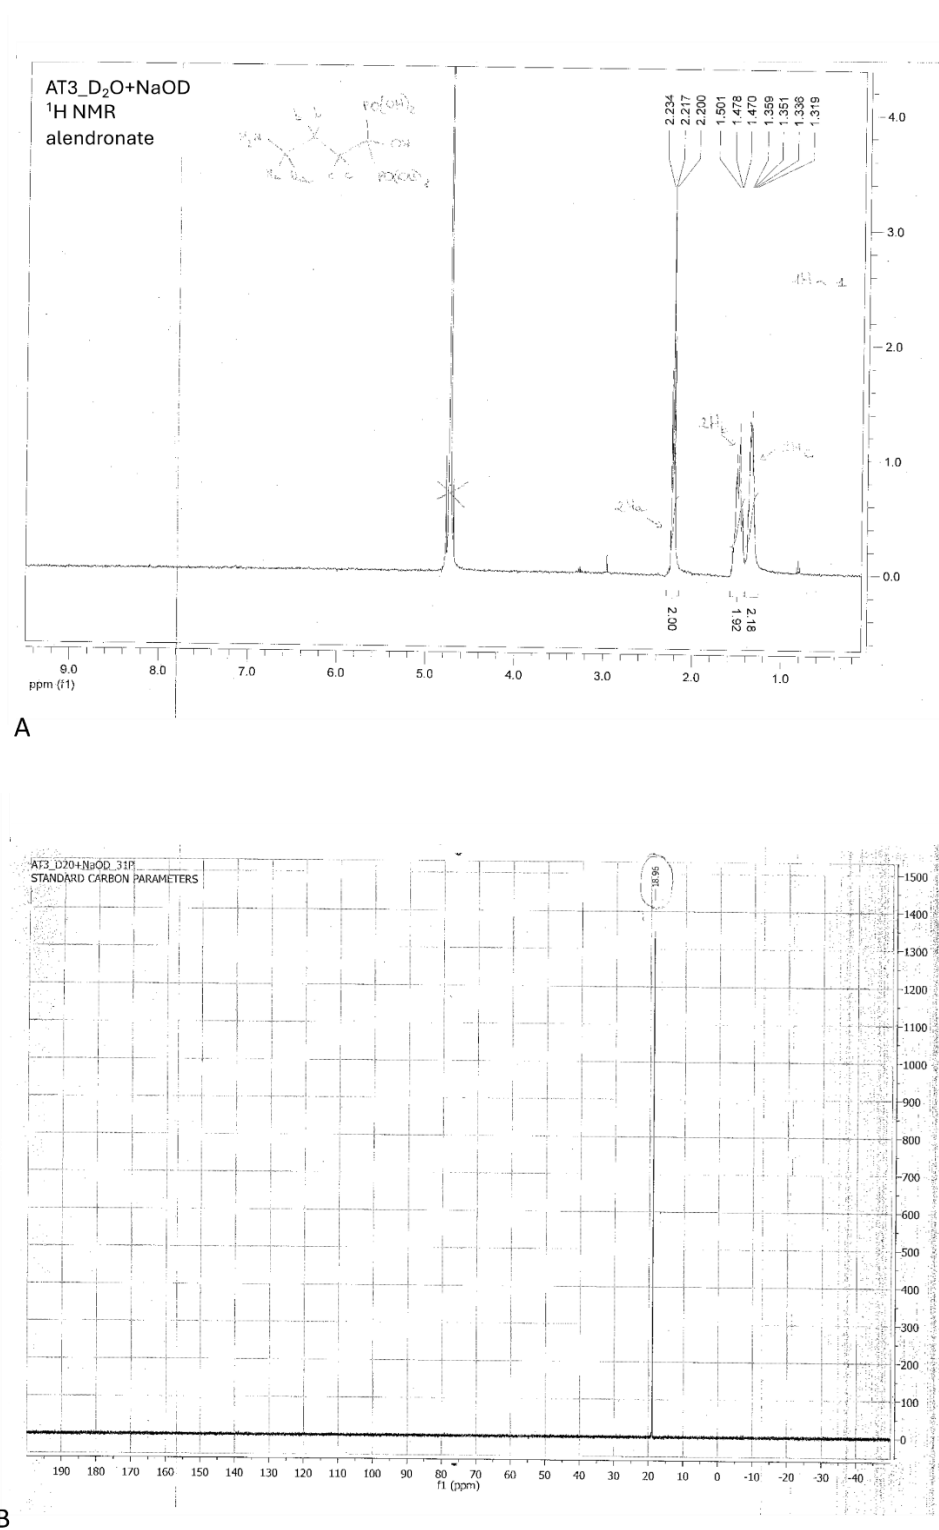

**Figure S5.** <sup>1</sup>H and <sup>31</sup>P NMR spectra of the target alendronate: A) Alendronate <sup>1</sup>H NMR spectrum recorded in D<sub>2</sub>O-NaOD; B) Alendronate <sup>31</sup>P NMR spectrum recorded in D<sub>2</sub>O-NaOD.
